# Supplementary material
Source: MDPI journal article supplement (https://www.mdpi.com/2313-0105/9/8/426)
Supplement: s1 [file s1]

# Supporting Information

## Flexible and stable N-isopropylacrylamide/sodium alginate gel electrolytes for aqueous Zn-MnO<sub>2</sub> batteries

Kehuang Wang, Mingliang Shangguan, Yibo Zhao, Haoran Tian, Fu Wang, Jinliang Yuan,

Lan Xia\*

### 1. Figure S1-S7

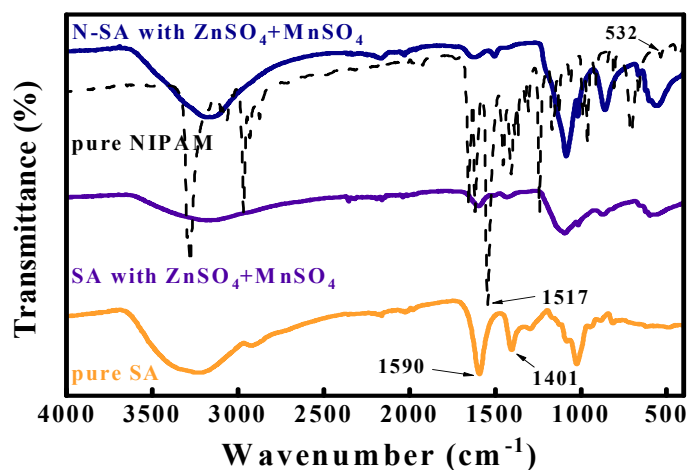

**Figure S1.** FTIR spectra of pure SA, pure NIPAM, SA and N-SA with ZnSO<sub>4</sub>+MnSO<sub>4</sub>.

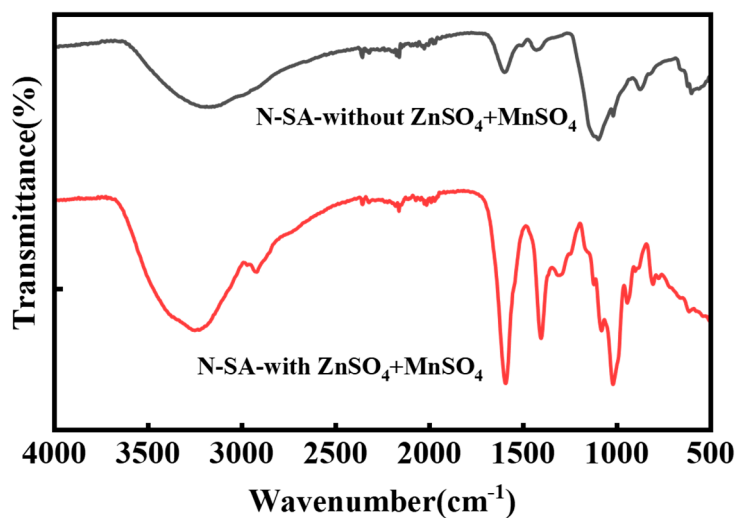

**Figure S2.** FTIR spectra of N-SA with and without ZnSO<sub>4</sub>+MnSO<sub>4</sub>.

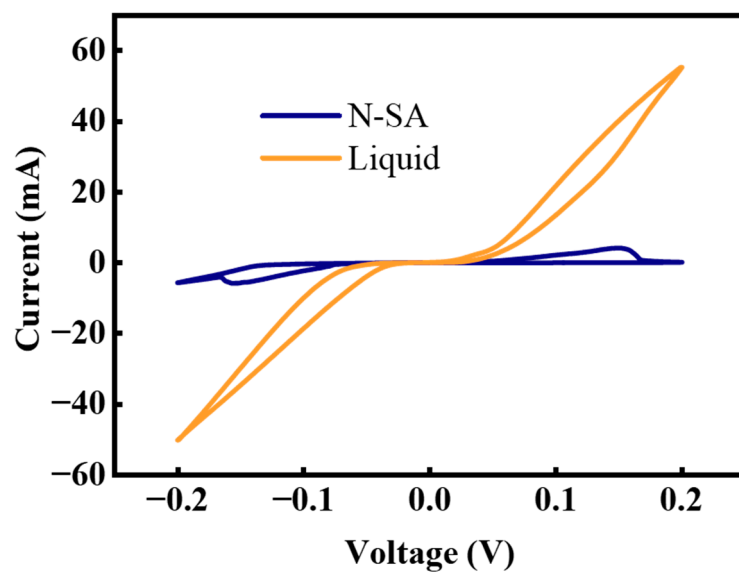

**Figure S3.** CV curves of symmetrical cells of the N-SA gel electrolyte and liquid electrolyte at  $1 \text{ mV s}^{-1}$ .

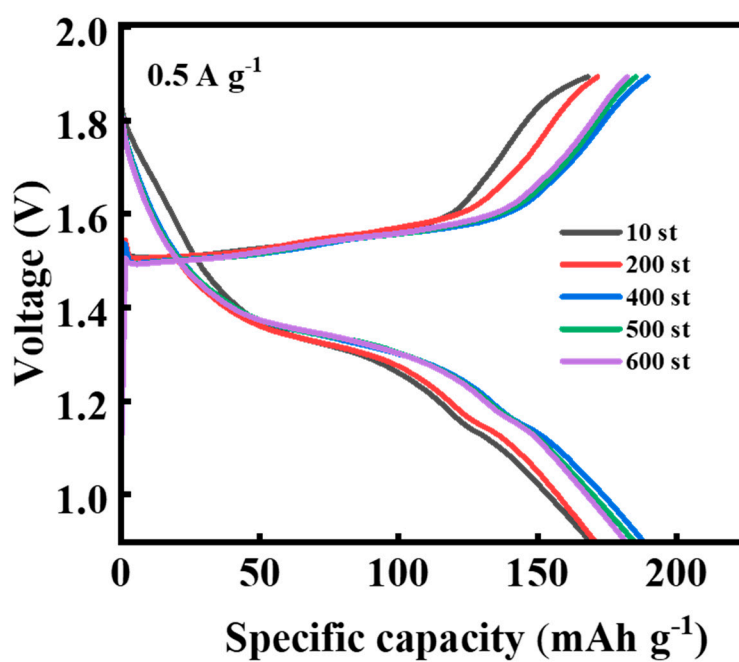

**Figure S4.** Discharge/charge profiles of Zn/MnO<sub>2</sub> cells with the N-SA hydrogel electrolyte at different cycles.

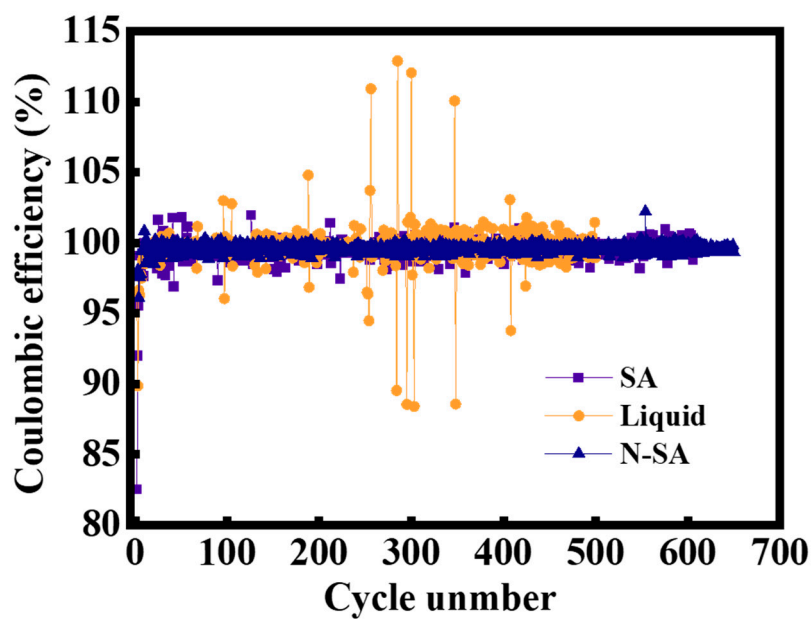

**Figure S5.** The coulombic efficiency of the Zn/MnO<sub>2</sub> asymmetric cells with the liquid, N-SA and SA gel electrolyte at 0.5 A g<sup>-1</sup>.

**a**

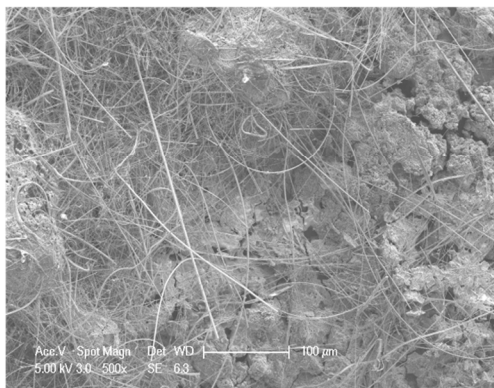

**b**

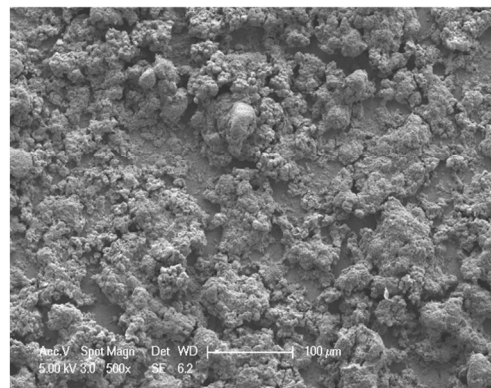

**Figure S6.** The SEM images of the positive electrodes collected from the cells with the liquid electrolyte (a) and N-SA hydrogel electrolyte (b) at 0.5 A g<sup>-1</sup> after 300 cycles.

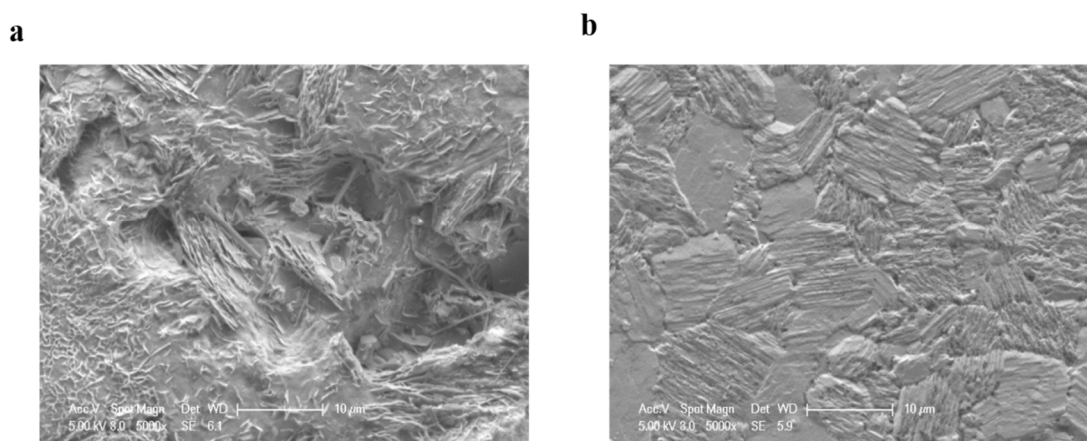

**Figure S7.** The SEM images of the Zn negative electrodes collected from the cells with the liquid electrolyte (a) and N-SA hydrogel electrolyte (b) at  $0.5 \text{ A g}^{-1}$  after 500 cycles.

## 2. Table S1

**Table S1.** The capacity retention of our Zn-MnO<sub>2</sub> battery with N-SA at room temperatures, in comparison with that of previously reported typical aqueous batteries (mainly including aqueous zinc-ion batteries (AZIBs)).

| Aqueous battery                | Electrolyte         | Specific capacity ( $\text{mAh g}^{-1}$ ) | Retention | Ref.             |
|--------------------------------|---------------------|-------------------------------------------|-----------|------------------|
| Zn/ $\alpha$ -MnO <sub>2</sub> | N-SA hydrogel       | 182@650 cycles at $0.5 \text{ A g}^{-1}$  | 98%       | <b>This work</b> |
| Zn/MnO <sub>2</sub>            | GG/SA/EG hydrogel   | 137@1000 cycles at $6 \text{ A g}^{-1}$   | 91.25%    | [1]              |
| Zn/MnO <sub>2</sub> @rGO       | PVA-B-G hydrogel    | 220 @2000 cycles at $1 \text{ A g}^{-1}$  | 93.7%     | [2]              |
| Zn/MnO <sub>2</sub>            | PVA-COOH hydrogel   | 177@1000 cycles at 1C                     | 83%       | [3]              |
| Zn/MnO <sub>2</sub> @rGO       | PAM-Lap hydrogel    | 97@600 cycles at $2 \text{ A g}^{-1}$     | --        | [4]              |
| Zn/MnO <sub>2</sub> @SWCNTs    | AMP-Mn/PVA hydrogel | 95@600 cycles at $2 \text{ A g}^{-1}$     | 99.97%    | [5]              |
| Zn/MnO <sub>2</sub> @CNT       | SPI/PAAM hydrogel   | 299.3@500 cycles at 0.2 C                 | 78.2%     | [6]              |
| Zn/MnO <sub>2</sub>            | PHEMA hydrogel      | 97@1000 cycles at $0.5 \text{ A g}^{-1}$  | 95%       | [7]              |
| Zn/MnO <sub>2</sub>            | PSPAZn hydrogel     | 110@220 cycles at $0.5 \text{ A g}^{-1}$  | 77.1%     | [8]              |

## References

1. Wang, J.; Huang, Y.; Liu, B.; Li, Z.; Zhang, J.; Yang, G.; Hiralal, P.; Jin, S.; Zhou, H. Flexible and Anti-Freezing Zinc-Ion Batteries Using a Guar-Gum/Sodium-Alginate/Ethylene-Glycol Hydrogel Electrolyte. *Energy Storage Mater.* **2021**, *41*, 599–605.
2. Chen, M.; Zhou, W.; Wang, A.; Huang, A.; Chen, J.; Xu, J.; Wong, C.-P. Anti-Freezing Flexible Aqueous Zn–MnO<sub>2</sub> Batteries Working at –35 °C Enabled by a Borax-Crosslinked Polyvinyl Alcohol/Glycerol Gel Electrolyte. *J. Mater. Chem. A* **2020**, *8*, 6828–6841.
3. Li, Q.; Cui, X.; Pan, Q. Self-Healable Hydrogel Electrolyte toward High-Performance and Reliable Quasi-Solid-State Zn–MnO<sub>2</sub> Batteries. *ACS Appl. Mater. Interfaces* **2019**, *11*, 38762–38770.
4. Liu, Z.-F.; Zhu, C.-Y.; Ye, Y.-W.; Zhang, Y.-H.; Cheng, F.; Li, H.-R. Synergistic Optimization Strategy Involving Sandwich-like MnO<sub>2</sub>@rGO and Laponite-Modified PAM for High-Performance Zinc-Ion Batteries and Zinc Dendrite Suppression. *ACS Appl. Mater. Interfaces* **2022**, *14*, 25962–25971.
5. Hu, Y.; Shen, P.; Zeng, N.; Wang, L.; Yan, D.; Cui, L.; Yang, K.; Zhai, C. Hybrid Hydrogel Electrolyte Based on Metal–Organic Supramolecular Self-Assembly and Polymer Chemical Cross-Linking for Rechargeable Aqueous Zn–MnO<sub>2</sub> Batteries. *ACS Appl. Mater. Interfaces* **2020**, *12*, 42285–42293.
6. Jiang, D.; Lu, N.; Li, L.; Zhang, H.; Luan, J.; Wang, G. A Highly Compressible Hydrogel Electrolyte for Flexible Zn–MnO<sub>2</sub> Battery. *J. Colloid Interface Sci.* **2022**, *608*, 1619–1626.
7. Wan, X.; Xie, Q.; Song, H.; Li, C.; Wang, J. Borax-Crosslinked Hydrogel Electrolyte Membranes for Quasi-Solid State Aqueous Energy Storage Devices. *J. Membr. Sci.* **2022**, *655*, 120606.
8. Yang, F.; Hua, H.; Lai, P.; Lin, P.; Yang, J.; Zhang, M.; Yang, Y.; Zhao, J. Synergetic Modulation of Ion Flux and Water Activity in a Single Zn<sup>2+</sup> Conductor Hydrogel Electrolyte for Ultrastable Aqueous Zinc-Ion Batteries. *ACS Appl. Energy Mater.* **2022**, *5*, 10872–10882.
